# Supplementary material for: Polyphasic Analysis of Intraspecific Diversity in Epicoccum nigrum Warrants Reclassification into Separate Species
Source: PLoS One. 2011 Aug 11;6(8):e14828. doi: 10.1371/journal.pone.0014828 (PMC3154903; doi:10.1371/journal.pone.0014828)
Supplement: Table S4 — Conidial dimensions of 46 Epicoccum strains grown on PDA medium. (0.06 MB DOC) [file pone.0014828.s004.doc]

Table S4. Conidial dimensions of 46 *Epicoccum* strains grown on PDA medium.

| **Strain** | **ITS group *a*** | **AFLP group *b*** | **Length (μm)** | **Width (μm)** | **Length / Width ratio** |
| --- | --- | --- | --- | --- | --- |
| CE5 | 1 | 1A | 38.53 a | 28.20 ba | 1.37 ebdac |
| CE25 | 1 | 1A | 38.19 ba | 28.18 ba | 1.36 ebdac |
| CE16 | 1 | 1A | 38.14 ba | 28.05 ba | 1.36 ebdac |
| P17 | 1 | 1A | 37.75 ba | 27.71 ba | 1.36 ebdac |
| CE18 | 1 | 1A | 36.73 bc | 26.56 bdc | 1.38 bdac |
| CE9 | 1 | 1A | 35.37 dc | 25.96 edc | 1.36 ebdac |
| 1F15 | 1 | 1A | 34.43 de | 25.20 ed | 1.35 ebdac |
| CE29 | 1 | 1B | 38.66 a | 29.01 a | 1.34 ebdac |
| CE24 | 1 | 1B | 37.69 ba | 27.34 bac | 1.39 bdac |
| CE11 | 1 | 1B | 34.82 de | 24.70 e | 1.41 a |
| CE12 | 1 | 1B | 34.14 de | 25.07 ed | 1.36 ebdac |
| CE13 | 1 | 1B | 33.28 e | 24.31 e | 1.37 ebdac |
| CE27 | 1 | 1B | 30.58 f | 22.53 f | 1.35 ebdac |
| P16 | 1 | 1B | 25.51 hgi | 19.16 hgi | 1.33 ebdac |
| CE51 | 1 | ND | 35.55 dc | 25.98 edc | 1.37 ebdac |
| TC41 | 2 | 2A | 23.76 ji | 17.96 kmjli | 1.41 ba |
| C13B | 2 | 2A | 26.16 g | 19.08 hjgi | 1.37 ebdac |
| C41B | 2 | 2A | 25.35 hgi | 18.56 khjgi | 1.37 ebdac |
| SP2 | 2 | 2A | 22.64 kjl | 16.75 pmoln | 1.36 ebdac |
| TH1 | 2 | 2A | 25.04 hgi | 19.11 hjgi | 1.31 ed |
| TH2 | 2 | 2A | 24.36 hji | 18.19 khjli | 1.34 ebdac |
| C22B | 2 | 2B | 25.41 hgi | 19.00 hjgi | 1.32 edc |
| C41A | 2 | 2B | 25.07 hgi | 18.71 khjgi | 1.34 ebdac |
| P18 | 2 | 2B | 24.07 hji | 18.32 khjli | 1.30 e |
| CV2 | 2 | 2B | 17.67 r | 12.81 s | 1.38 bdac |
| Ep1sc | 2 | 2C | 21.96 kml | 15.86 poqn | 1.39 bac |
| P24 | 2 | ND | 26.69 g | 20.13 g | 1.33 ebdc |
| P13 | 2 | ND | 26.66 g | 19.86 hg | 1.34 ebdac |
| P31 | 2 | ND | 25.64 hg | 19.76 hg | 1.30 e |
| P64 | 2 | ND | 23.97 hji | 17.90 kmjli | 1.34 ebdac |
| P42 | 2 | ND | 23.81 ji | 18.56 khjgi | 1.29 e |
| P82 | 2 | ND | 23.13 kj | 17.46 kmjln | 1.32 edc |
| P910 | 2 | ND | 22.69 kjl | 17.07 kmoln | 1.33 ebdac |
| P83 | 2 | ND | 21.96 kml | 16.15 pon | 1.37 ebdac |
| P112 | 2 | ND | 21.82 kml | 16.33 pmon | 1.34 ebdac |
| P61 | 2 | ND | 21.33 nml | 15.68 proq | 1.36 ebdac |
| P44 | 2 | ND | 20.94 noml | 15.94 poqn | 1.31 edc |
| P62 | 2 | ND | 20.80 nomp | 15.39 proq | 1.35 ebdac |
| P21 | 2 | ND | 20.75 nomp | 15.73 proq | 1.32 edc |
| P58 | 2 | ND | 20.33 nomp | 15.21 prq | 1.32 edc |
| P91 | 2 | ND | 19.84 noqp | 15.37 prq | 1.29 e |
| P51 | 2 | ND | 19.45 oqp | 14.37 rqs | 1.36 ebdac |
| P81 | 2 | ND | 19.26 roqp | 14.32 rqs | 1.35 ebdac |
| P55 | 2 | ND | 19.08 rqp | 14.11 rs | 1.35 ebdac |
| P74 | 2 | ND | 19.08 rqp | 14.16 rs | 1.34 ebdac |
| P92 | 2 | ND | 18.43 rq | 14.09 rs | 1.31 ed |

*a* Groups obtained by phylogenetic or ITS-RFLP analysis using the ITS1-5.8S-ITS2 region of the rDNA units. *b* Groups and subgroups generated by AFLP analysis. Means (n = 85 conidia) followed by the same letter in each column indicate that they were not statistically different (Tukey’s test, *P* >5%). (ND) Not determined.
